# Supplementary material for: Extracting nano-gold from HAuCl4 solution manipulated with electrons
Source: Royal Society of Chemistry journal article supplement (doi:10.1039/c6cp06032c), 2016-01-01
Supplement: c6cp06032c1.pdf [file c6cp06032c1.pdf]

## Electronic Supplementary Information (ESI)

### Extracting Nano-gold from H<sub>2</sub>AuCl<sub>4</sub> Solution Manipulated with Electrons

Y. Lu, K. Wang, F. -R. Chen, W. Zhang\* and M. L. Sui\*

#### S1. Calculated procedures

##### Calculation of the electric potential

High-quality deionized water is an excellent insulator, whose conductivity is only  $\sim 5.5 \times 10^{-8} \text{ S} \cdot \text{cm}^{-1}$ .<sup>1</sup> Under the irradiation of electron beam, the emission of secondary or Auger electrons from the water can result in a positive charge potential within the irradiated volume.<sup>2</sup> The positive potential is expressed as,

$$V(r) = \frac{Q}{4\pi\epsilon d} \left( 1 - \frac{r^2}{a^2} + 2 \ln \frac{r_0}{a} \right), \dots\dots\dots (1)$$

where Q is the total charge trapped into the irradiated area in water.  $\epsilon$  is the dielectric constant of the aqueous solution.  $a$  is the radius of electron beam (0.5  $\mu\text{m}$ ).  $r_0$  is the distance (250  $\mu\text{m}$ ) between the centre of electron beam and the location with the potential at  $\sim 0 \text{ V}$ .  $d$  is the thickness of water solution. Here we use the inner edge of silicon reservoir as the zero potential site.  $r$  is the distance away from the electron beam centre.<sup>2</sup>

$$Q = \frac{I_0(\delta^x + \gamma^x)\epsilon}{\gamma} \dots\dots\dots (2)$$

$\delta^x + \gamma^x$  is the integrated yields of secondary and Auger electrons, which is calculated to be  $\sim 0.065$ - $0.120$  for water solution by using CASINO software.<sup>3</sup> The electron beam current  $I_0$  is 1.26 nA (dose rate  $I$  is  $\sim 100 \text{ e}^- \cdot \text{\AA}^{-2} \cdot \text{s}^{-1}$ ) in the experiment.  $\gamma$  is the conductivity of aqueous solution in  $\text{S} \cdot \text{cm}^{-1}$ . The theoretical conductivity of aqueous solution is correlated to its basic physical and chemical properties of ions<sup>4</sup>

$$\gamma(\text{S} \cdot \text{cm}^{-1}) = \sum_i C_{i^+} \lambda_{i^+} + \sum_j C_{j^-} \lambda_{j^-} \dots\dots\dots (3)$$

$C_{i^+}$  and  $C_{j^-}$  are the concentrations of  $i$  cation and  $j$  anion, respectively.  $\lambda_{i^+}$  and  $\lambda_{j^-}$  are the ion conductivities in aqueous solution, with  $349.6 \text{ S} \cdot \text{cm}^2 \cdot \text{mol}^{-1}$  for  $\text{H}^+$  and  $199.1 \text{ S} \cdot \text{cm}^2 \cdot \text{mol}^{-1}$  for

$\text{OH}^-$ , respectively, and the conductivities for these two radicals ( $\text{H}^+$  and  $\text{OH}^\cdot$ ) in water are dominantly higher than the ones for other hydrated metal ions in aqueous solution.<sup>5</sup> Here we should point out that  $\text{Si}_3\text{N}_4$  film has a much lower electric conductivity (of  $\sim 10^{-6}$ - $10^{-15} \text{ S}\cdot\text{cm}^{-1}$ ) comparing with water.<sup>6,7</sup> This fact may increase the maximum potential of charging effect in water solution under the irradiation of electron beam.

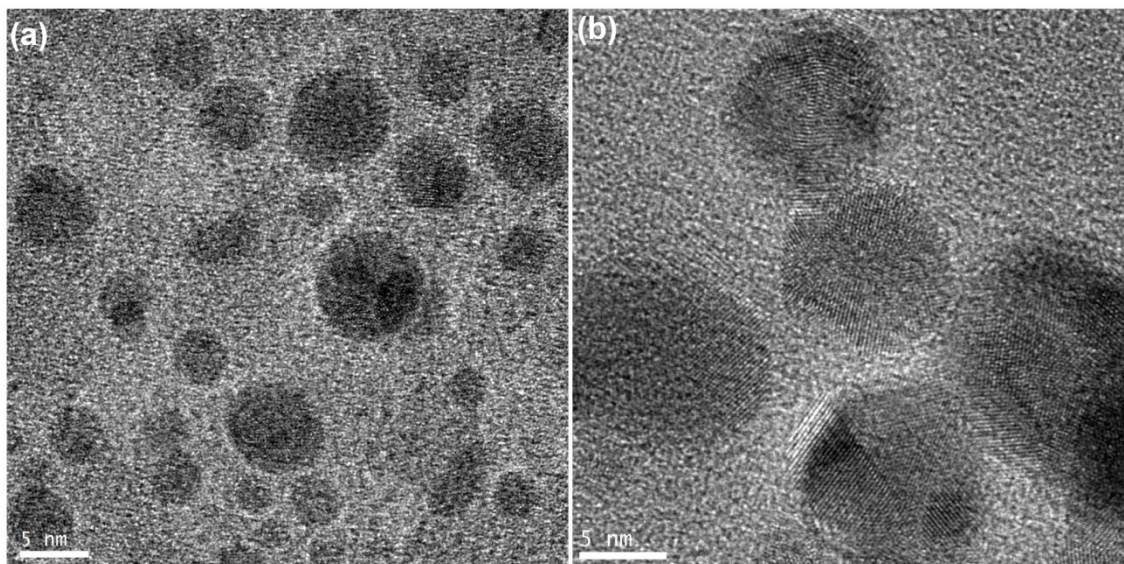

Fig. S1 HRTEM images of the Au NP seeds in vacuum. (a) The Au NP seeds have a size range from 3 to 7 nm, the average size is 5 nm for the Au seeds. (b) HRTEM image shows that these Au NP seeds are multiply twinned.

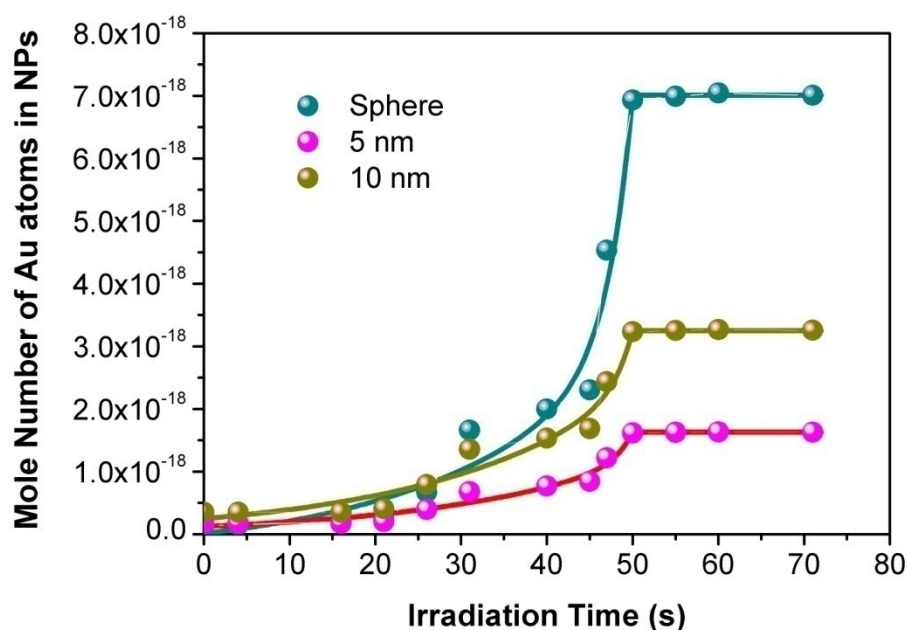

Fig. S2 Mole number of Au atoms in the Au nanoparticles in SEI: movie as a change of the electron beam irradiation time. Dots denote the experimental data and cures are the fitting results when we consider the Au nanoparticles with a thickness of 5 nm, 10 nm and sphere shape, respectively. As the pristine Au nanoparticles have a diameter of  $\sim 5$  nm, we consider the growth of the Au nanoparticles following a lamellar structure with a thickness of 5 nm (orange line) or lamella structure with a thickness of 10 nm (yellow line). However, according to a previous liquid cell TEM report, the growth of Au nanoparticle adopts a ball structure when the thickness of water solutions between 200-400 nm.<sup>8</sup> In our experiment, the thickness of water solution is  $\sim 248 \pm 25$  nm, so we also calculate the mole number of Au atoms in Au nanoparticles if considering the shape of NPs as a sphere.

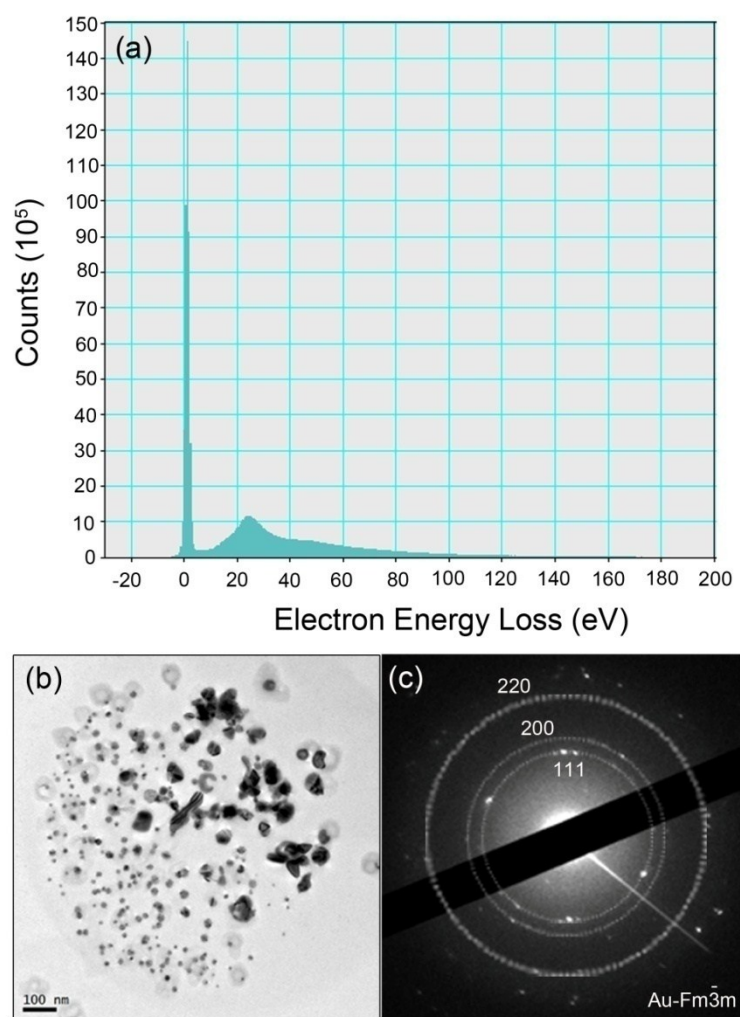

Fig. S3 (a) EELS of the initial water. We can fit the thickness of water to be  $\sim 248 \pm 25$  nm. (b) Au nanoparticles only precipitated from the water solution in the beam irradiated area. (c) Diffraction pattern (DP) shows that the nanoparticles have a crystal structure of Au-Fm $\bar{3}$ m.

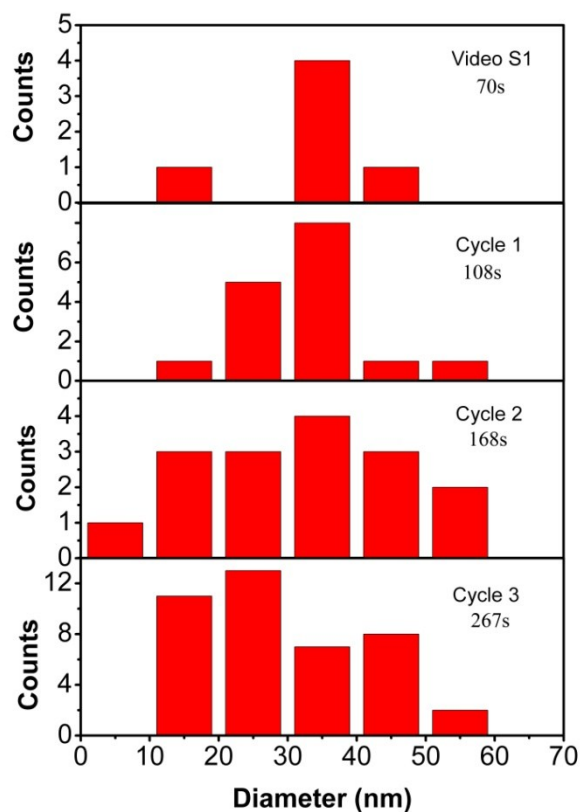

Fig. S4 Size distribution diagrams (particle diameter vs. counts of NPs) of the Au nanoparticles in ESI: Video S1 at 70s, cycle 1 at 108 s, cycle 2 at 168 s and cycle 3 at 267 s respectively (ESI: Video S2 and Fig. 7).

## S2. Videos:

Here are two videos: Video S1 and Video S2. The videos show the growth of Au nanoparticles and the segregation of hydrated Au atoms in water solution under the irradiation of electron beam, as shown in ESI: Video S1 and Video S2. A steady-state of ~19 s recorded before Video S2 (Fig. 7).

## References

- 1 E. Busenburg and L. N. Plummer, *pH measurement of low-conductivity waters*, US. US Geological Survey, 1987.
- 2 J. Cazaux, *Ultramicroscopy*, 1995, **60**, 411.
- 3 P. Hovington, D. Drouin, R. Gauvin, *Scanning*, 1997, **19**, 1. A software package can be downloaded from the Web: <http://www.gel.usherbrooke.ca/casino/>.
- 4 T. S. Light, S. Licht, A. C. Bevilacqua and K. R. Morash, *Electrochem. Solid ST.*, 2005, **8**, E16.
- 5 M. R. Wright, *An Introduction to Aqueous Electrolyte Solutions*, Wiley, 2007.
- 6 Y. Nishi and D. Robert eds. *Handbook of semiconductor manufacturing technology*. CRC Press, 2000, 324.
- 7 S. M. Sze, *Semiconductor devices: physics and technology*. Wiley-India. 2008, 384.
- 8 J. H. Park, N. M. Schneider, J. M. Grogan, M. C. Reuter, H. H. Bau, S. Kodambaka and F. M. Ross, *Nano lett.*, 2015, **15**, 5314.
